# Supplementary material for: OTUD6A promotes prostate tumorigenesis via deubiquitinating Brg1 and AR
Source: Commun Biol. 2022 Mar 1;5:182. doi: 10.1038/s42003-022-03133-1 (PMC8888634; doi:10.1038/s42003-022-03133-1)

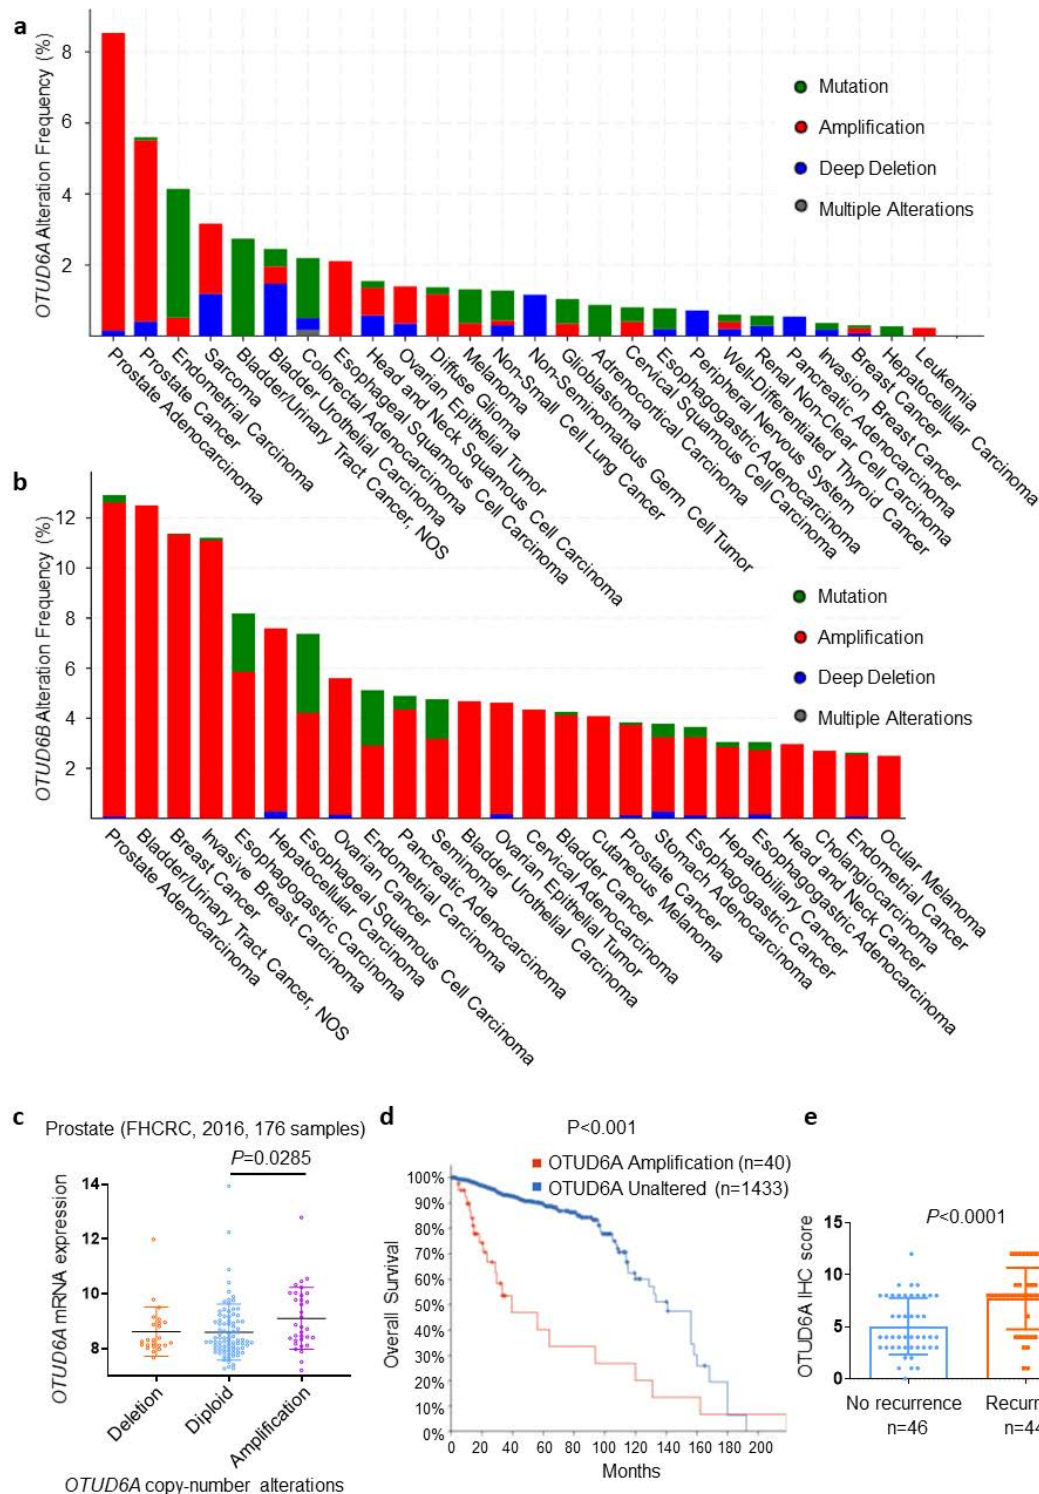

**Supplementary Figure 1: OTUD6A is amplified in PCa**

**a, b** The alteration frequency (including mutation, amplification, deep deletion and multiple alterations) of OTUD6A (a) and OTUD6B (b) in different cancer patient samples were analyzed by integrating the online datasets (<http://www.cbioportal.org/>).

**c** The correlation of *OTUD6A* DNA copy number alteration with *OTUD6A* mRNA expression levels in PCa patient samples in the FHCRC (2016, 176 samples) dataset (<http://www.cbiportal.org/>). **d** Kaplan-Meier plot of overall survival based on the *OTUD6A* amplification or unaltered in PCa patient samples by analyzing the integrated online datasets (<http://www.cbiportal.org/>). **e** The correlation of *OTUD6A* expression with biochemical recurrence in PCa patients from the Shanghai Changhai Hospital cohort (n=90).

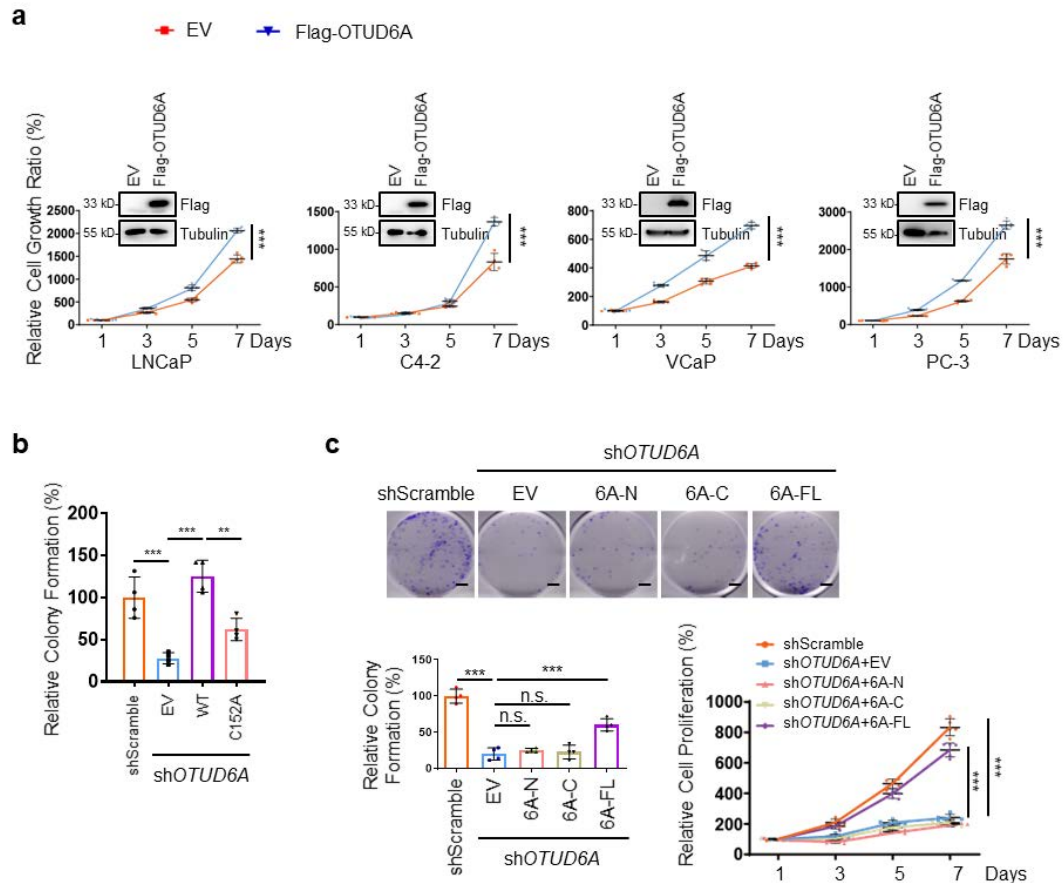

## Supplementary Figure 2: OTUD6A promotes PCa proliferation

**a** LNCaP, C4-2, VCaP and PC-3 cells were transfected with empty vector (EV) or Flag-OTUD6A plasmids and cell growth ratio were examined by SRB assays. Data were shown as mean  $\pm$  SD of three independent experiments. \*\*\* $P$ <0.001. Immunoblotting (IB) analysis of the whole cell lysates (WCLs) were shown on the top of curves. **b** The statistic results related to Fig. 2d. Data were shown as mean  $\pm$  SD of three independent experiments. \*\*0.001< $P$ <0.01, \*\*\* $P$ <0.001, n.s.: non-significant. **c** Representative images of the colony formation assay of C4-2-shScramble or C4-2-shOTUD6A cells transfected with the indicated plasmids. Scale bar: 5 mm. The statistic results were shown as mean  $\pm$  SD of three independent experiments. And the corresponding cell growth ratio were examined by SRB assays (right panel). Data were shown as mean  $\pm$

SD of three independent experiments. \*\*\* $P < 0.001$ . 6A-N, N-terminus of OTUD6A;  
6A-C, C-terminus of OTUD6A; 6A-FL, full length of OTUD6A.

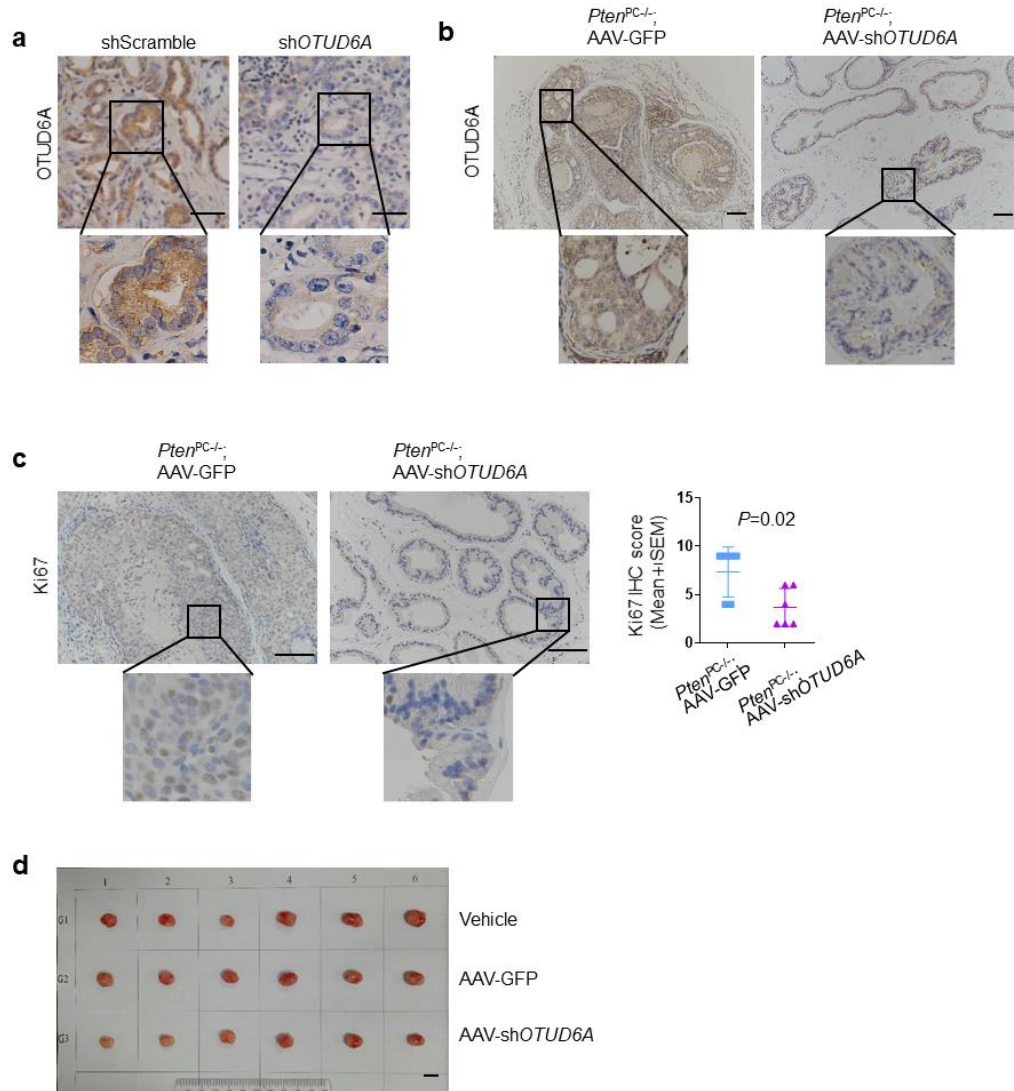

**Supplementary Figure 3: OTUD6A oligonucleotides markedly suppress prostate tumorigenesis derived from *Pten*<sup>PC-/-</sup> mice and patient-derived xenograft (PDX) models**

**a** Representative images of OTUD6A IHC staining of C4-2-derived xenografts. Scale bars: 50  $\mu$ m. **b** OTUD6A-stained sections of representative VP tissues, scale bars: 100  $\mu$ m. **c** Representative images and scores of Ki67 IHC staining in AAV-GFP and AAV-shOTUD6A treatment groups. Scale bar: 100  $\mu$ m. Data were shown as mean  $\pm$  SD. Statistical significance was determined by two-tailed unpaired Student's t-test. **d** Image of the collected tumors related to Fig. 3e-g. Scale bar: 1 cm.

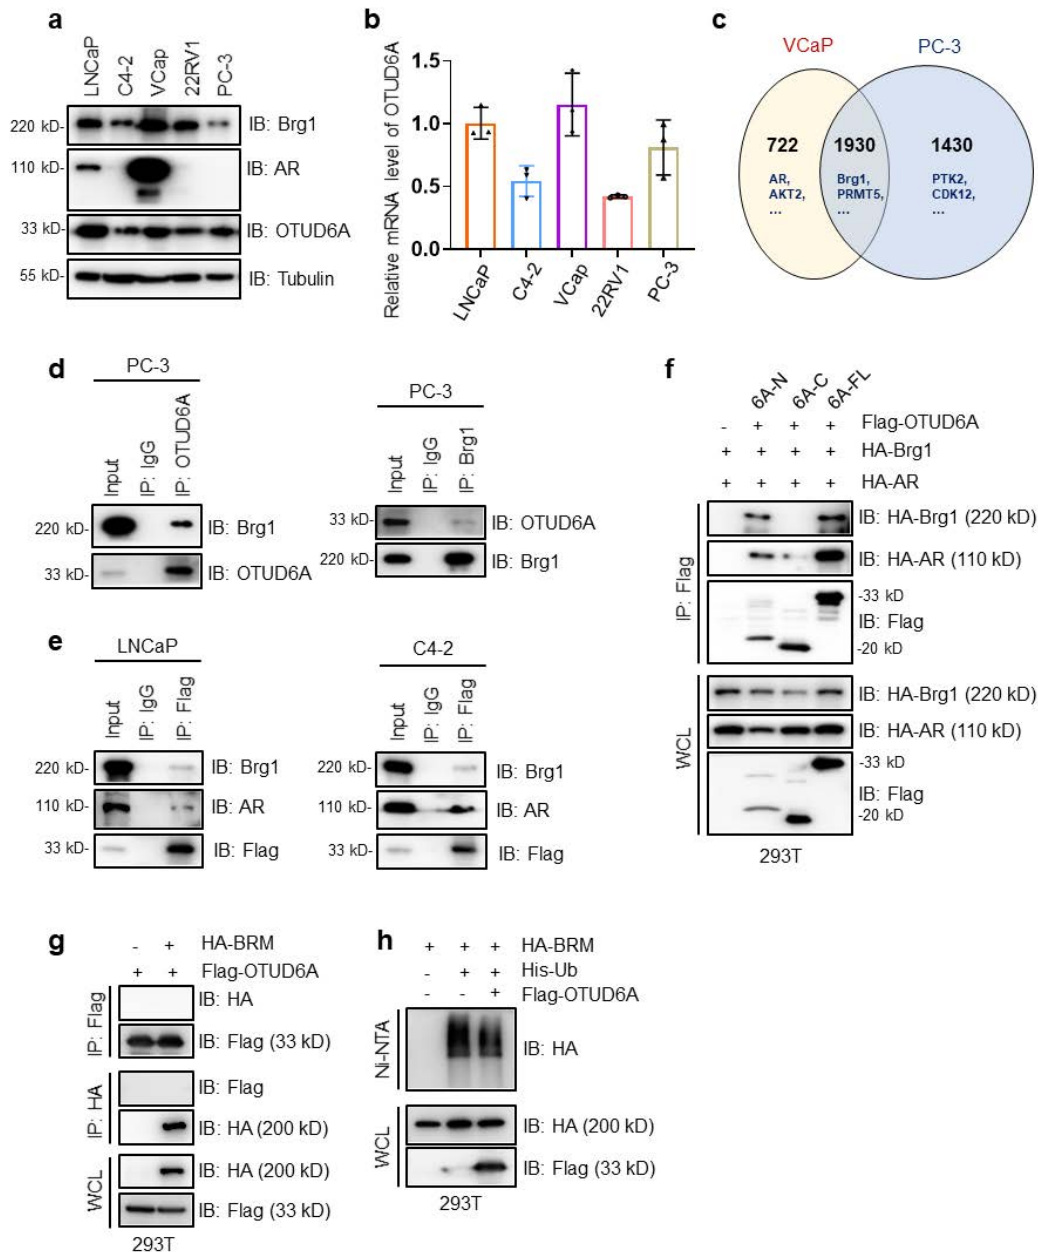

**Supplementary Figure 4: OTUD6A binds with Brg1 and AR**

**a** The protein expression of OTUD6A, Brg1 and AR in different PCa cell lines were examined by IB. **b** The mRNA expression of OTUD6A in different PCa cell lines were examined by RT-PCR. **c** Venn diagram showed the number of identified OTUD6A interaction proteins in VCaP and PC-3 cells by IP-MS. **d** Co-IP experiments in PC-3 cells were performed using anti-OTUD6A (left) or anti-Brg1 (right) antibodies. IgG was used as a negative control. **e** Co-IP experiments in LNCaP and C4-2 cells

transfected with Flag-OTUD6A were performed using anti-Flag antibody or anti-mouse IgG. **f** IB analysis of WCLs and IPs derived from 293T cells transfected with Flag-OTUD6A fragments together with the indicated HA-Brg1 and HA-AR plasmids. 6A-N, N-terminus of OTUD6A; 6A-C, C-terminus of OTUD6A; 6A-FL, full length of OTUD6A. **g** IB analysis of WCLs and IPs derived from 293T cells transfected with Flag-OTUD6A together with or without HA-BRM. **h** IB analysis of WCLs and IPs derived from 293T cells transfected with the indicated HA-BRM, Flag-OTUD6A and His-Ub plasmids.

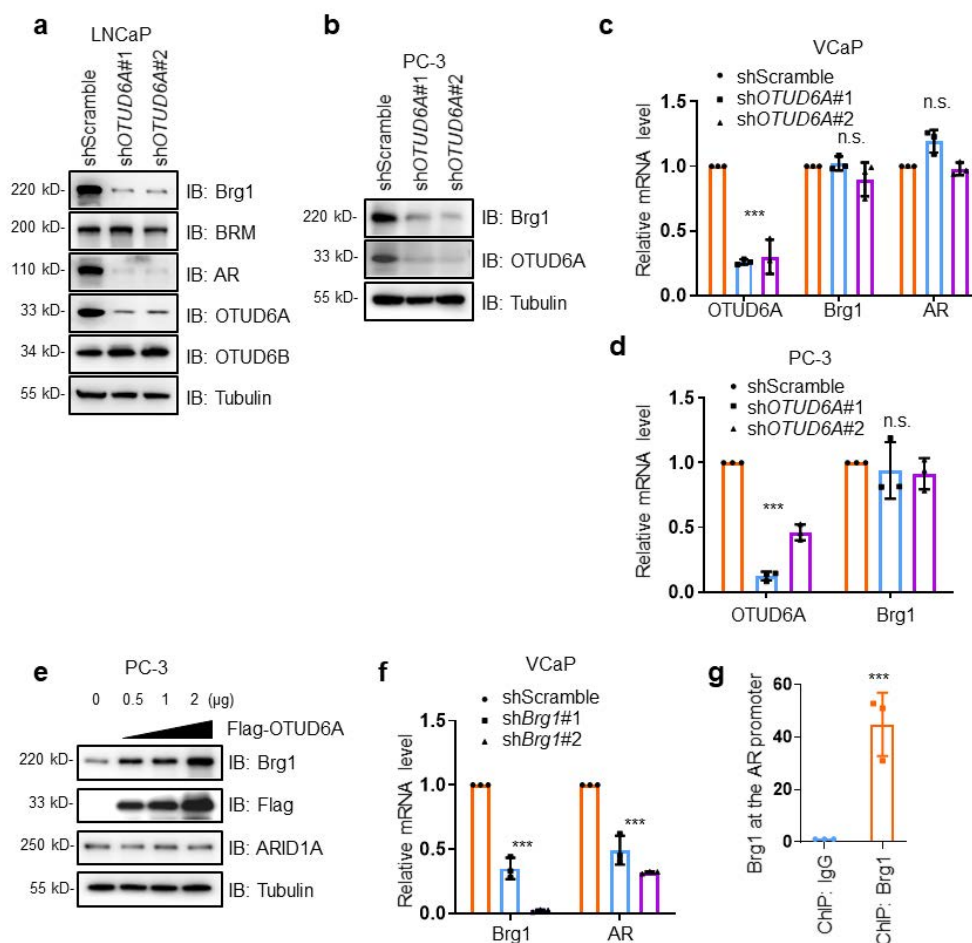

### Supplementary Figure 5: OTUD6A stabilizes Brg1 and AR

**a** IB analysis in LNCaP cells infected with lentivirus expressing indicated shRNAs. **b** IB analysis in PC-3 cells infected with lentivirus expressing indicated shRNAs. **c, d** VCaP and PC-3 cells were infected with lentivirus expressing indicated shRNAs and then for RT-PCR analysis. Data were shown as mean  $\pm$  SD ( $n = 3$ ), \*\*\* $P < 0.001$ , n.s.: non-significant. **e** IB analysis in PC-3 cells transfected with the indicated plasmids for 48 hr. **f** VCaP cells were infected with lentivirus expressing indicated shRNAs and then for RT-PCR analysis. Data were shown as mean  $\pm$  SD ( $n = 3$ ), \*\*\* $P < 0.001$ . **g** The ChIP assay was carried out using antibodies directed against IgG or Brg1 in VCaP cells, and then the bound and input DNAs were analyzed using primers of AR promoter region by

RT-PCR. IgG was used as a negative control. Data were shown as mean  $\pm$  SD (n = 3),

\*\*\* $P < 0.001$ .

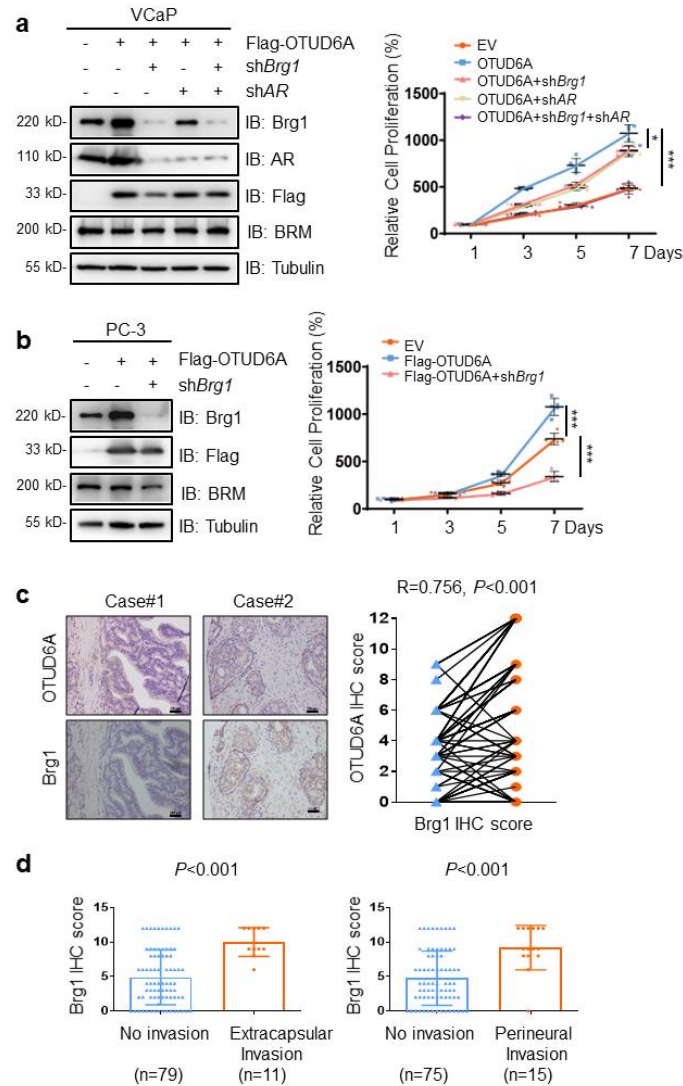

**Supplementary Figure 6: Brg1 expression is highly correlated with OTUD6A expression and tumor progress in PCa**

**a, b** VCaP and PC-3 cells were transfected with indicated plasmids and cell growth ratio were examined by SRB assays. Data were shown as mean  $\pm$  SD of three independent experiments. \* $P<0.05$ , \*\*\* $P<0.001$ . The left panels showed the corresponding IB results. **c** Representative images of OTUD6A and Brg1 IHC staining in prostate cancer tissues. And the right panel showed the correlation of OTUD6A and Brg1.  $n=90$ ; Scale bar, 100  $\mu$ m. **d** The correlation of Brg1 with extracapsular invasion and perineural invasion in PCa patient samples ( $n=90$ ).

**Supplementary Figure 7**

Uncropped blots related to Figure 2a

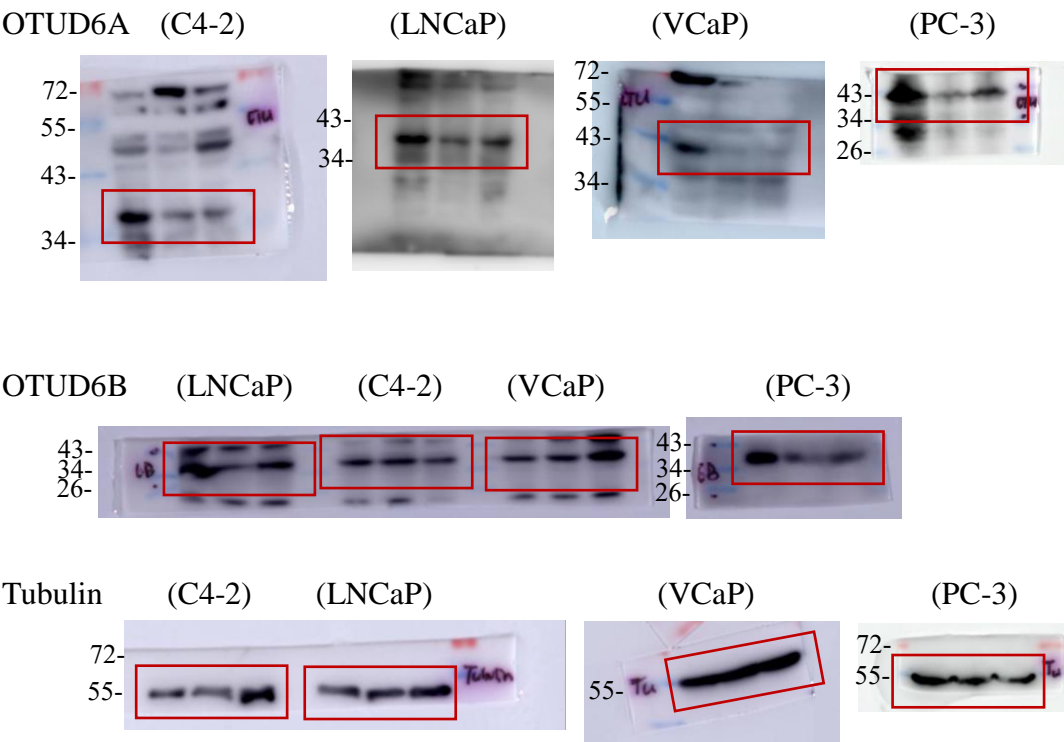

Uncropped blots related to Figure 2c

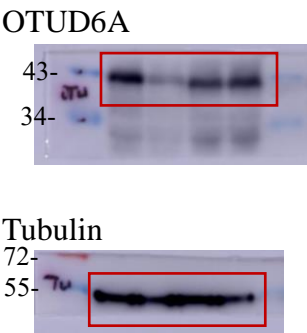

Uncropped blots related to Figure 3d, 3h, 4b

Fig. 3d-PTEN

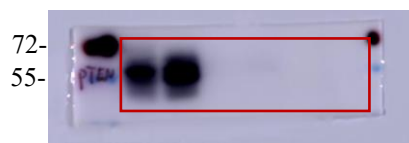

Fig. 3d-OTUD6A

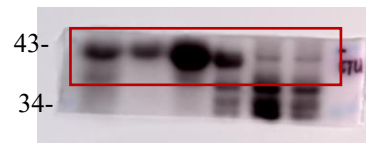

Fig. 3d-Tubulin

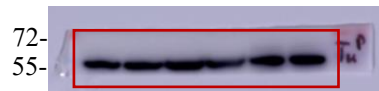

Fig. 3h-OTUD6A

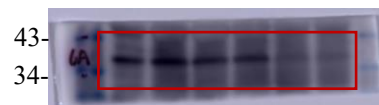

Fig. 3h-Tubulin

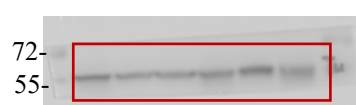

Fig. 4b-Brg1 (upper)

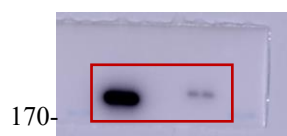

Fig. 4b-AR (upper)

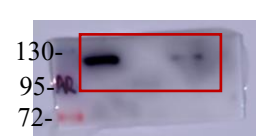

Fig. 4b-OTUD6A (upper)

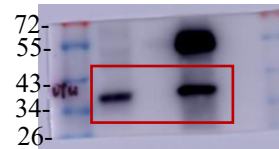

Fig. 4b-OTUD6A (lower)

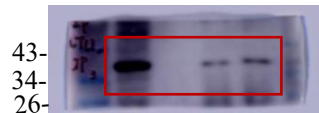

Fig. 4b-AR (lower)

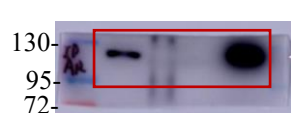

Fig. 4b-Brg1 (lower)

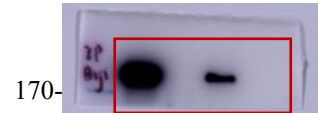

Uncropped blots related to Figure 4c, 4d

Fig. 4c-HA-Brg1 (IP)

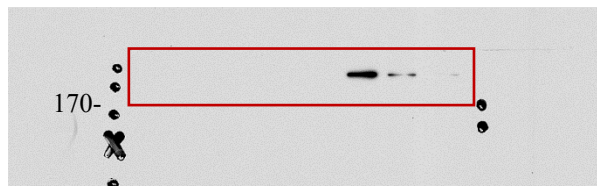

Fig. 4c-HA-Brg1 (WCL)

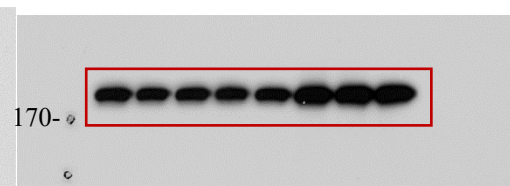

Fig. 4c-Flag-DUBs (IP)

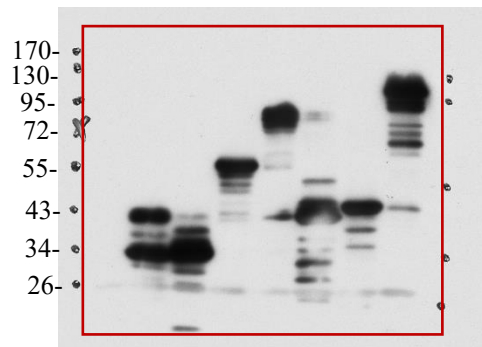

Fig. 4c-Flag-DUBs (WCL)

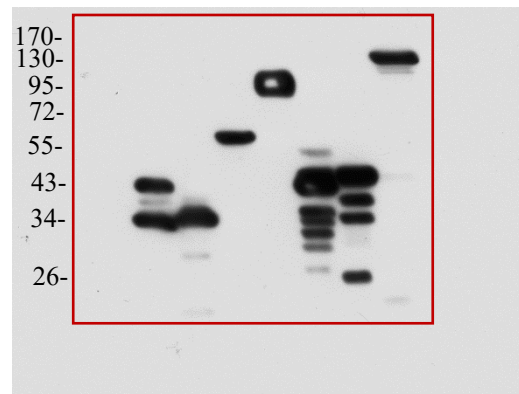

Fig. 4d-HA-AR (IP)

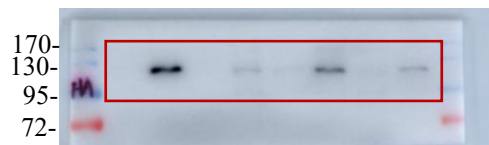

Fig. 4d-HA-AR (WCL)

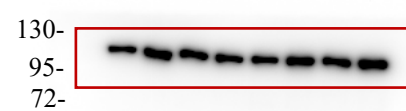

Fig. 4d-Flag-DUBs (IP)

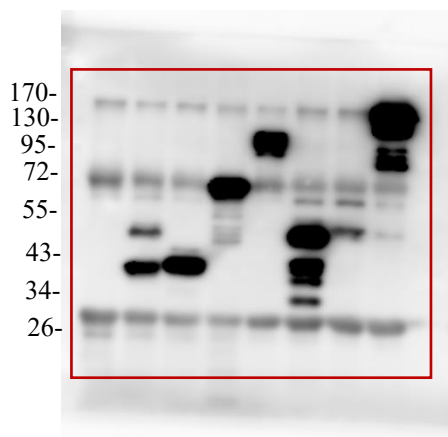

Fig. 4d-Flag-DUBs (WCL)

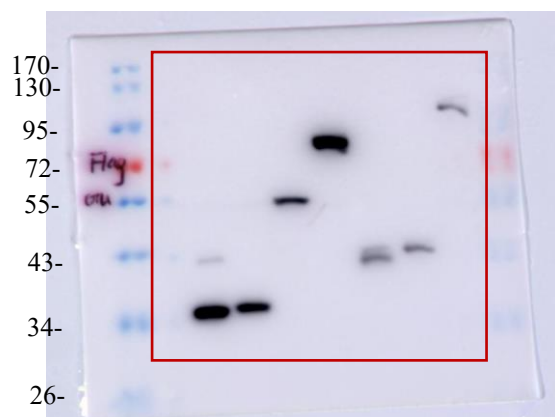

Uncropped blots related to Figure 4e

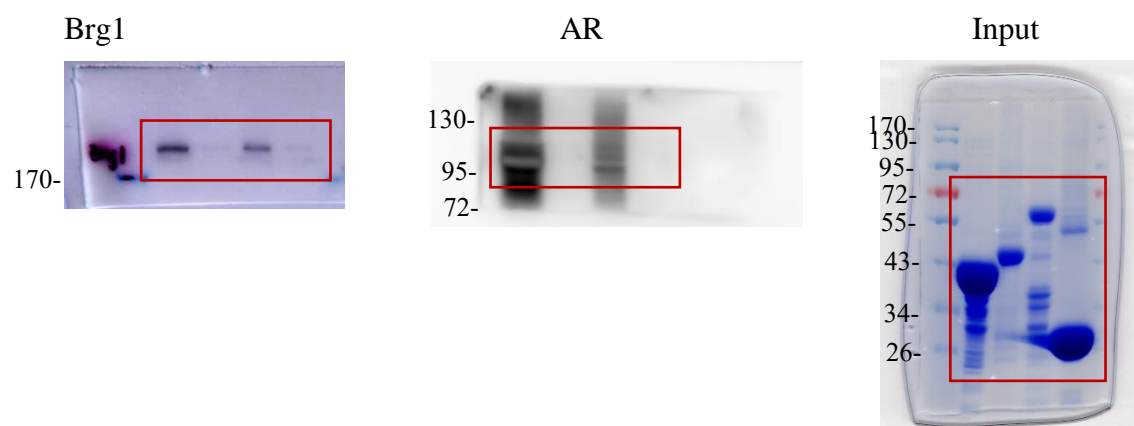

Uncropped blots related to Figure 4f, 4g

Fig. 4f-HA-Brg1 (IP)

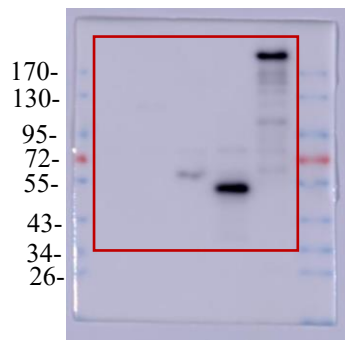

Fig. 4f-HA-Brg1 (Input)

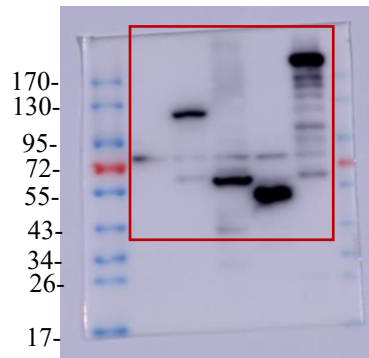

Fig. 4f-Flag-OTUD6A (IP)

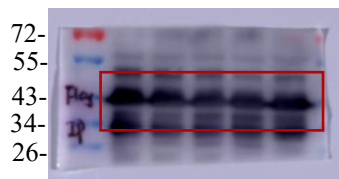

Fig. 4f-Flag-OTUD6A (Input)

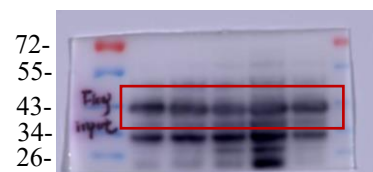

Fig. 4g-HA-AR (IP)

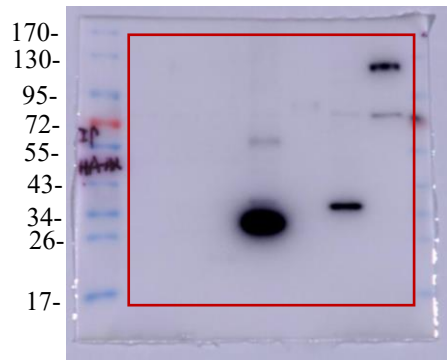

Fig. 4g-HA-AR (Input)

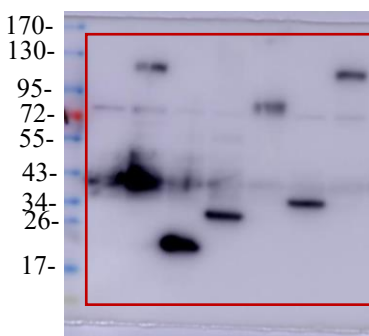

Fig. 4g-Flag-OTUD6A (IP)

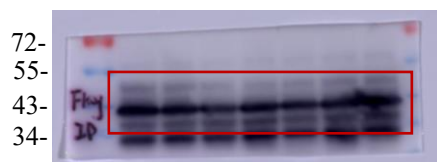

Fig. 4g-Flag-OTUD6A (Input)

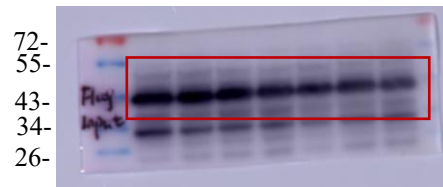

Uncropped blots related to Figure 5a

Brg1

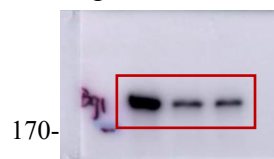

BRM

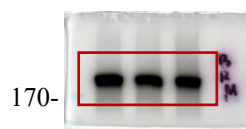

AR

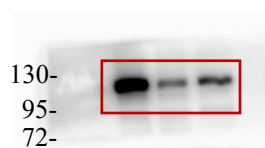

OTUD6A

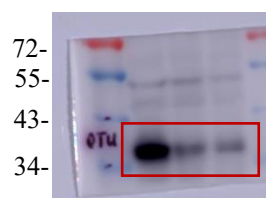

OTUD6B

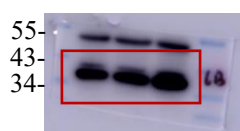

Tubulin

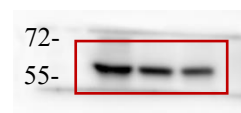

Uncropped blots related to Figure 5b

Brg1 (VCaP)

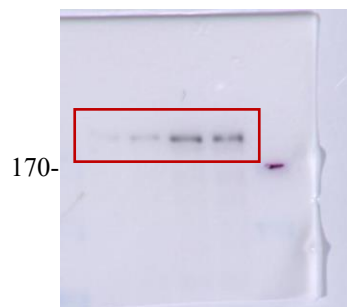

HA-Brg1 (293T)

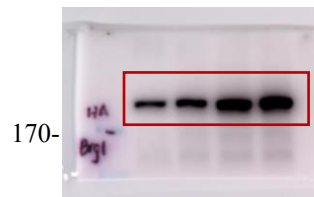

BRM (VCaP)

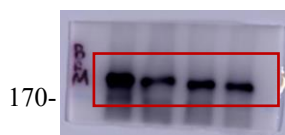

AR (VCaP)

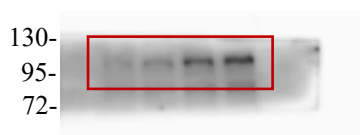

HA-AR (293T)

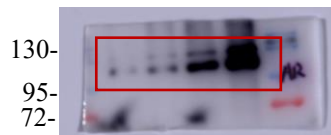

Flag-OTUD6A (VCaP)

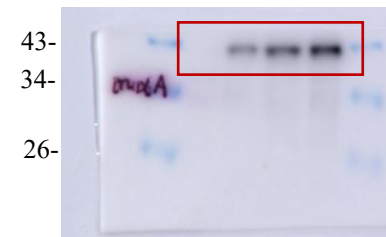

Flag-OTUD6A (293T)

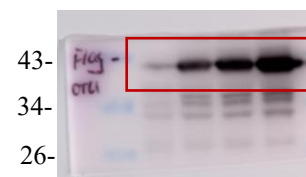

Tubulin (VCaP)

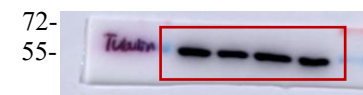

Tubulin (293T)

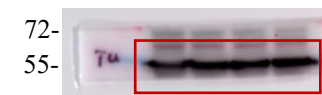

Uncropped blots related to Figure 5c, 5d

Fig. 5c-AR (shOTUD6A)

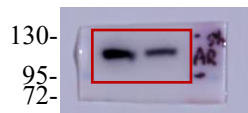

Fig. 5c-AR (Flag-OTUD6A)

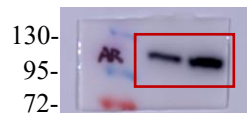

Fig. 5c-OTUD6A (shOTUD6A)

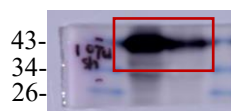

Fig. 5c-OTUD6A (Flag-OTUD6A)

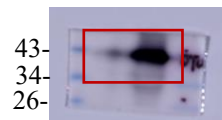

Fig. 5c-Tubulin (shOTUD6A)

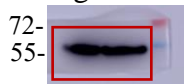

Fig. 5c- Tubulin (Flag-OTUD6A)

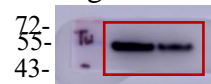

Fig. 5d-Brg1

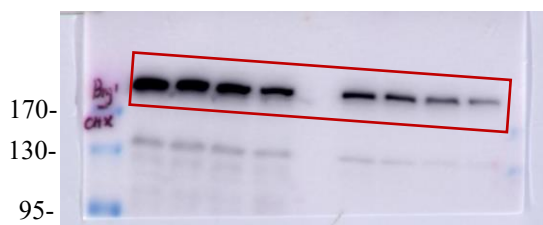

Fig. 5d-AR

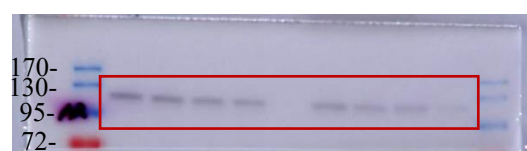

Fig. 5d-OTUD6A

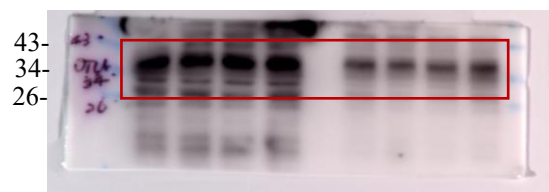

Fig. 5d-Tubulin

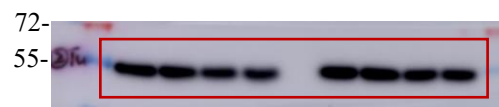

Uncropped blots related to Figure 5e, 5f

Fig.5e-Brg1 (IP: HA)

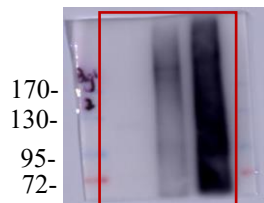

Fig.5e-AR (IP: HA)

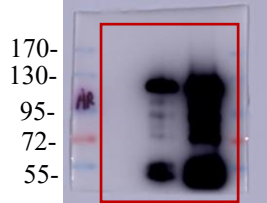

Fig.5e-Brg1 (IP: WCL)

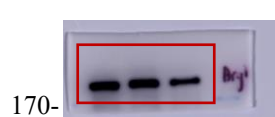

Fig.5e-AR (WCL)

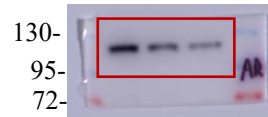

Fig.5e-OTUD6A (WCL)

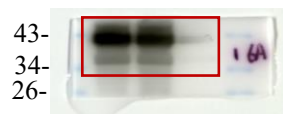

Fig.5e-Tubulin (WCL)

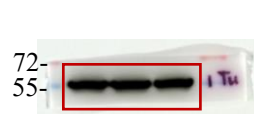

Fig.5f-AR (IP: HA)

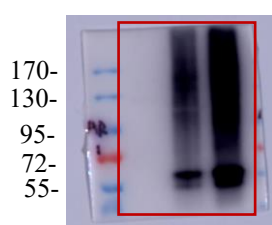

Fig.5f-OTUD6A (WCL)

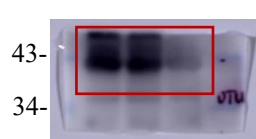

Fig.5f-AR (WCL)

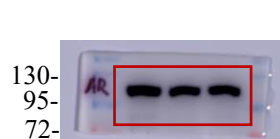

Fig.5f-Tubulin (WCL)

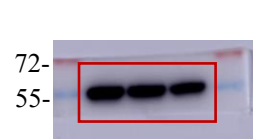

Uncropped blots related to Figure 5g

HA-Brg1 (Ni-NTA)

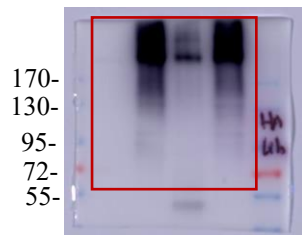

HA-AR (Ni-NTA)

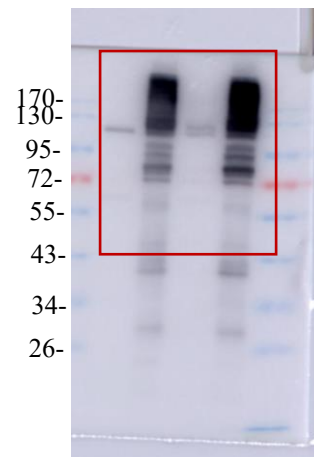

HA-Brg1 (WCL)

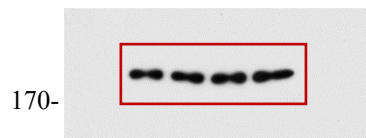

HA-AR (WCL)

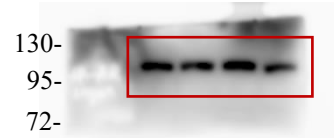

Flag-OTUD6A/OTUD6B (WCL)

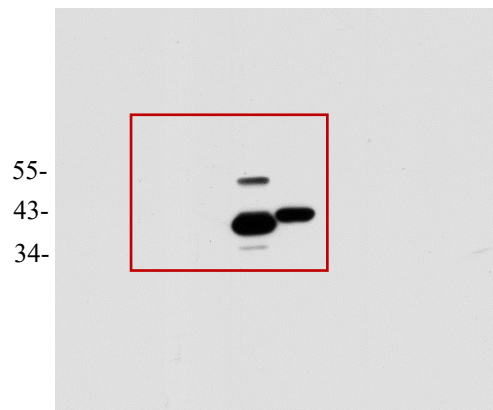

Flag-OTUD6A/OTUD6B (WCL)

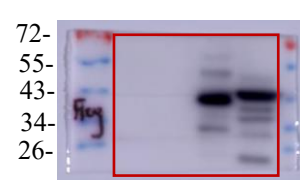

Uncropped blots related to Figure 5h

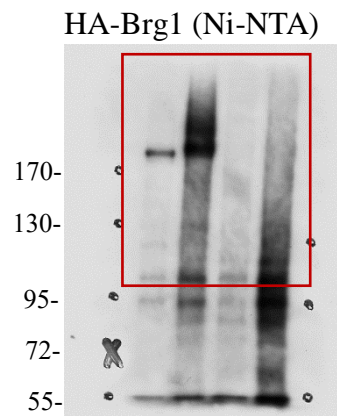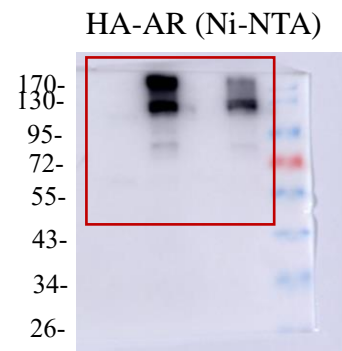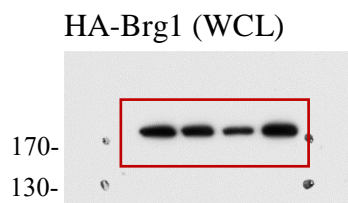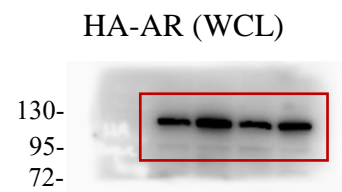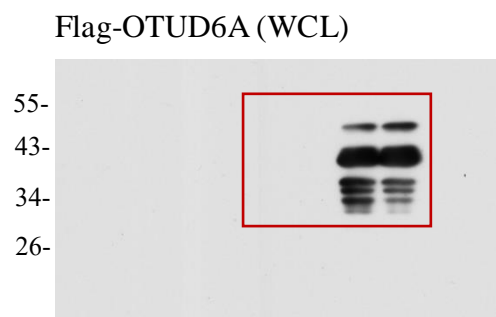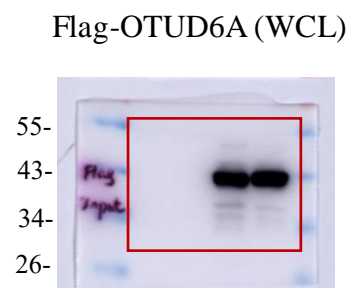

Uncropped blots related to Figure 5i

Brg1

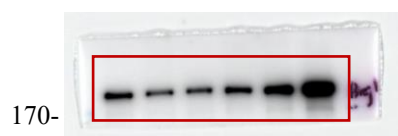

AR

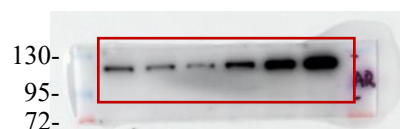

Flag-OTUD6A

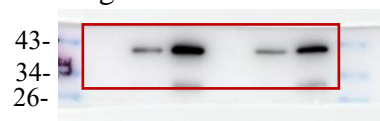

Tubulin

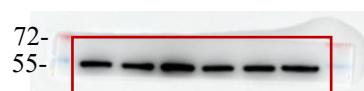

Uncropped blots related to Figure 6a, 6b

Fig. 6a-HA (Ub)<sub>n</sub>-Brg1 (IP: Flag)

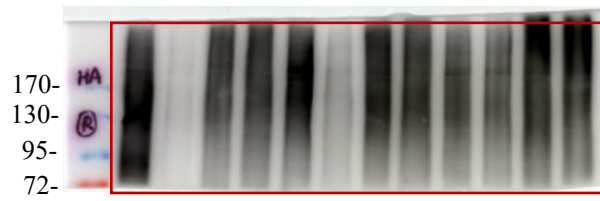

Fig. 6a-Myc-OTUD6A (Input)

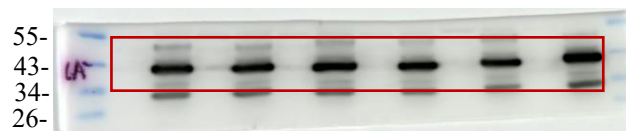

Fig. 6a-Flag-Brg1 (Input)

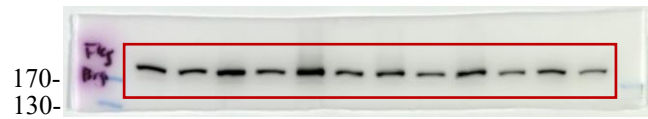

Fig. 6b-HA (Ub)<sub>n</sub>-Brg1 (IP: Flag)

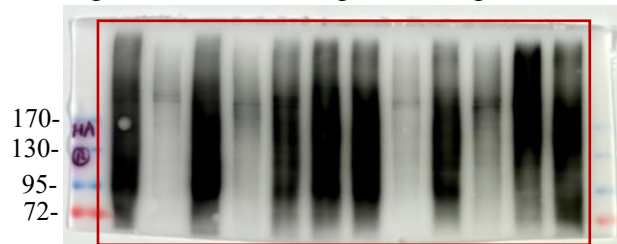

Fig. 6b-Myc-OTUD6A (Input)

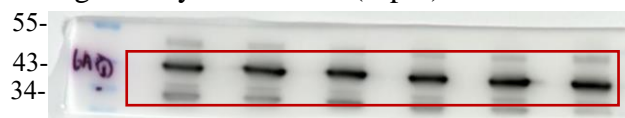

Fig. 6b-Flag-Brg1 (Input)

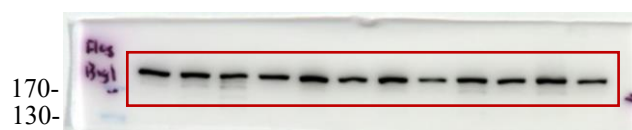

Uncropped blots related to Figure 6c, 6d

Fig. 6c-HA (Ub)n-AR (IP: Flag)

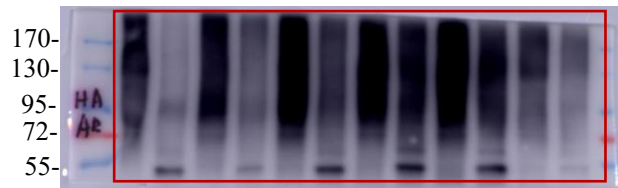

Fig. 6c-Myc-OTUD6A (Input)

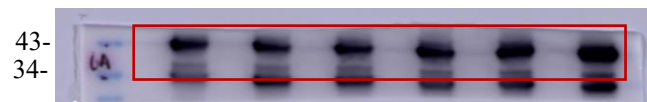

Fig. 6c-Flag-AR (Input)

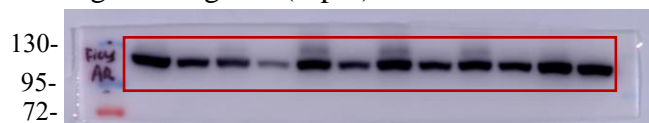

Fig. 6d-HA (Ub)n-AR (IP: Flag)

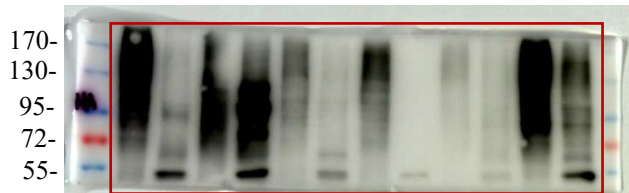

Fig. 6d-Myc-OTUD6A (Input)

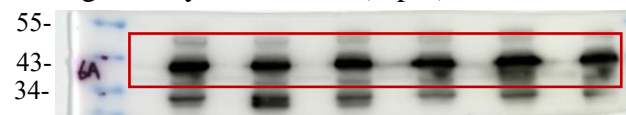

Fig. 6d-Flag-AR (Input)

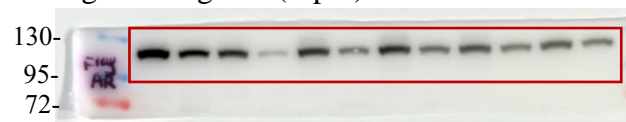

Uncropped blots related to Figure 6e, 6f, 6g

Fig. 6e-HA (Ni-NTA)

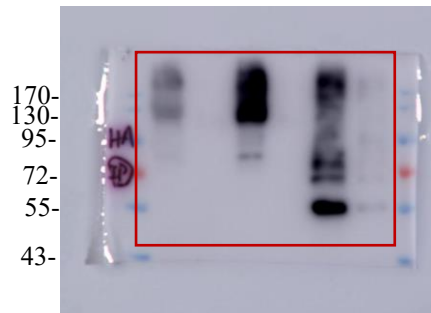

Fig. 6e-Flag-OTUD6A (WCL)

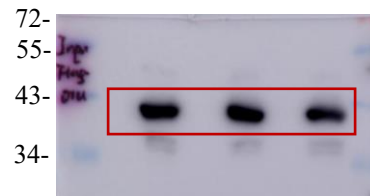

Fig. 6e-GFP-FBW7 (WCL)

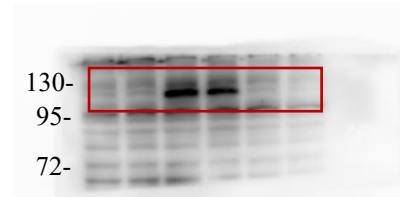

Fig. 6e-Myc-SPOP (WCL) Fig. 6e-HA-Brg1/AR (WCL)

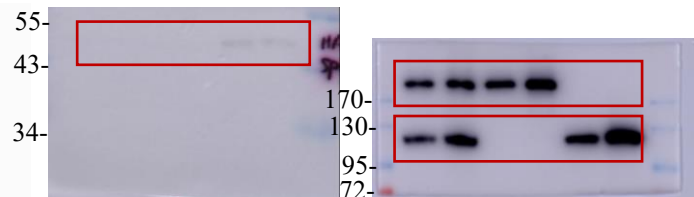

Fig. 6f-HA (Ub)n-Brg1 (IP)

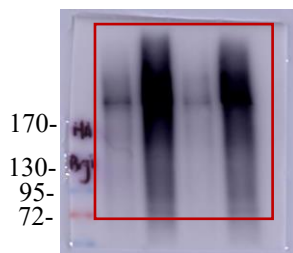

Fig. 6g-HA (Ub)n-AR (IP)

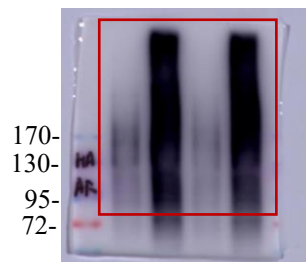

Fig. 6f-GFP-FBW7 (Input)

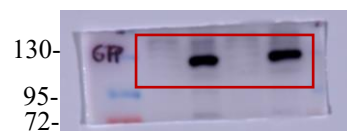

Fig. 6g-Myc-SPOP (Input)

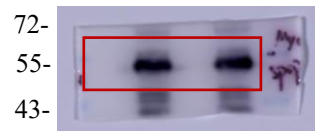

Fig. 6f-Flag-Brg1 (Input)

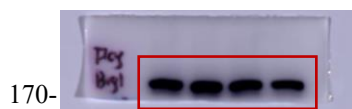

Fig. 6g-Flag-AR (Input)

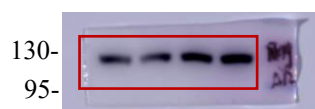

Uncropped blots related to Supplementary Figure 2a, 4a

Fig. S2a-Flag-OTUD6A (LNCaP) (C4-2) (VCaP) (PC-3)

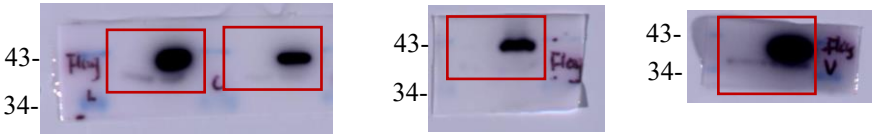

Fig. S2a-Tubulin (LNCaP) (C4-2) (VCaP) (PC-3)

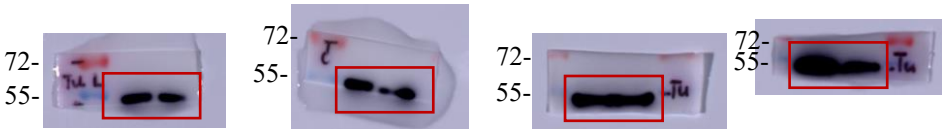

Fig. S4a-Brg1

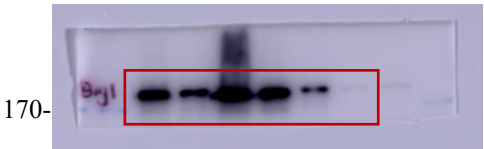

Fig. S4a-AR

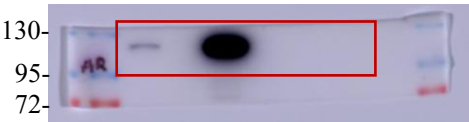

Fig. S4a-OTUD6A

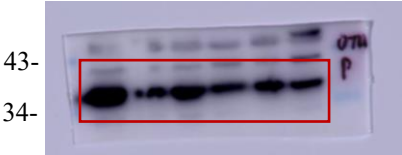

Fig. S4a-Tubulin

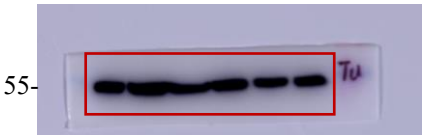

Uncropped blots related to Supplementary Figure 4d, 4e

Fig. S4d-Brg1 (IP: OTUD6A) (PC-3)

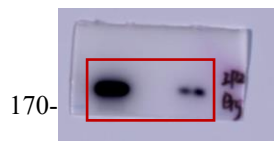

Fig. S4d-OTUD6A (IP: OTUD6A) (PC-3)

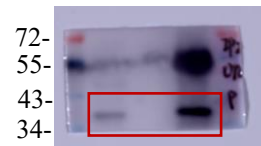

Fig. S4d-OTUD6A (IP: Brg1) (PC-3)

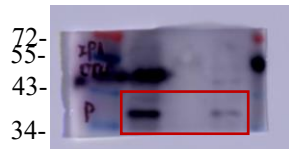

Fig. S4d-Brg1 (IP: Brg1) (PC-3)

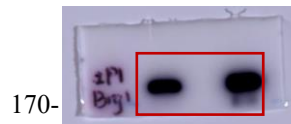

Fig. S4e-Brg1 (LNCaP)

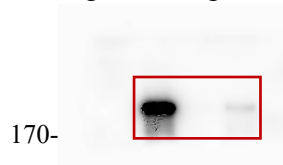

Fig. S4e-Brg1 (C4-2)

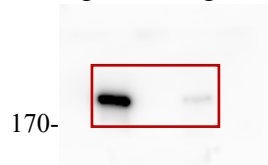

Fig. S4e-AR (LNCaP)

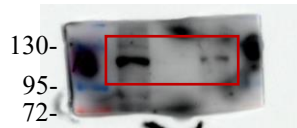

Fig. S4e-AR (C4-2)

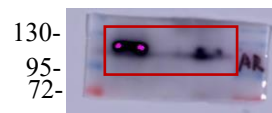

Fig. S4e-Flag-OTUD6A (LNCaP)

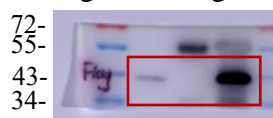

Fig. S4e-Flag-OTUD6A (C4-2)

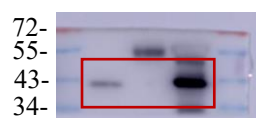

Uncropped blots related to Supplementary Figure 4f, 4g, 4h

Fig. S4f-HA-Brg1 (IP)

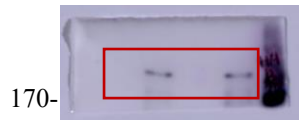

Fig. S4f-HA-Brg1 (Input)

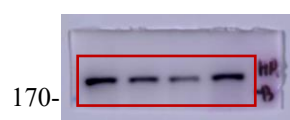

Fig. S4f-HA-AR (IP)

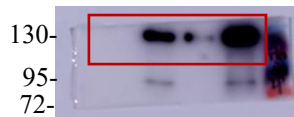

Fig. S4f-HA-AR (Input)

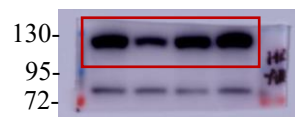

Fig. S4f-Flag-OTUD6A (IP)

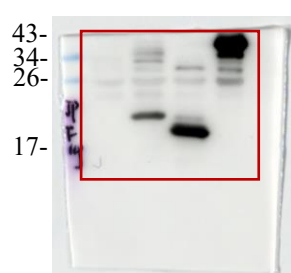

Fig. S4f-Flag-OTUD6A (Input)

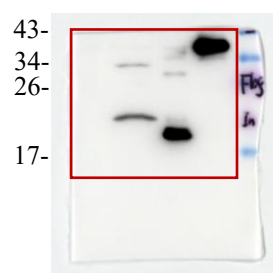

Fig. S4g-HA-BRM (IP: WCL, IP: Flag, IP: HA)

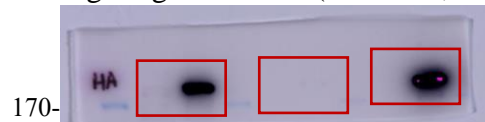

Fig. S4g-Flag-OTUD6A (WCL, IP: Flag, IP: HA)

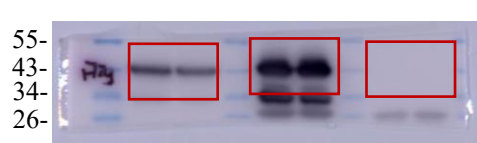

Fig. S4h-HA-BRM (Ni-NTA)

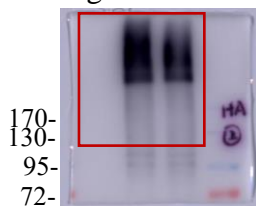

Fig. S4h-HA-BRM (WCL)

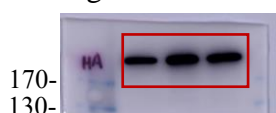

Fig. S4h-Flag-OTUD6A (WCL)

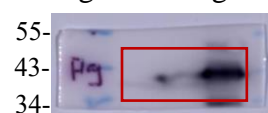

Uncropped blots related to Supplementary Figure 5a, 5b, 5e

Fig. S5a-Brg1

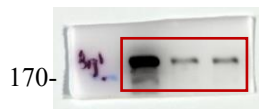

Fig. S5a-BRM

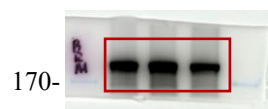

Fig. S5a-AR

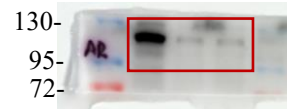

Fig. S5a-OTUD6A

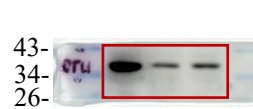

Fig. S5a-OTUD6B

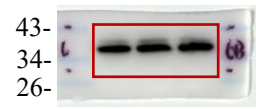

Fig. S5a-Tubulin

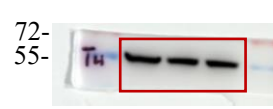

Fig. S5b-Brg1

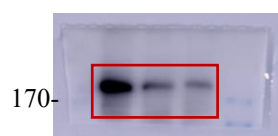

Fig. S5b-OTUD6A

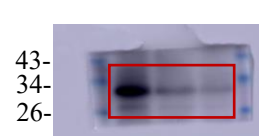

Fig. S5b-Tubulin

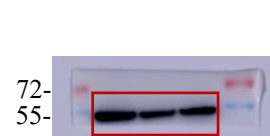

Fig. S5e-Brg1

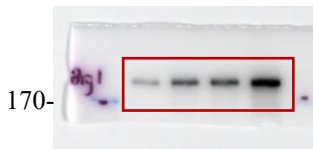

Fig. S5e-Flag-OTUD6A

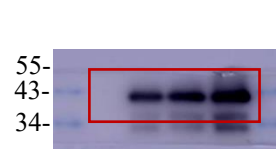

Fig. S5e-ARID1A

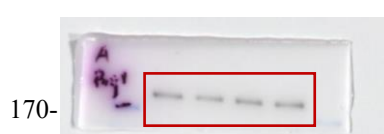

Fig. S5e-Tubulin

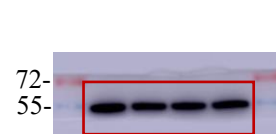

Uncropped blots related to Supplementary Figure 6a, 6b

Fig. S6a-Brg1

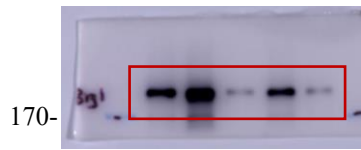

Fig. S6a-AR

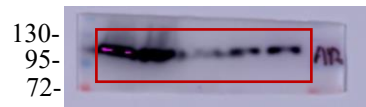

Fig. S6a-Flag-OTUD6A

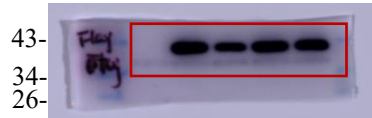

Fig. S6a-BRM

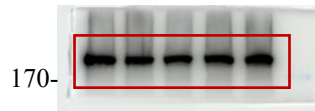

Fig. S6a-Tubulin

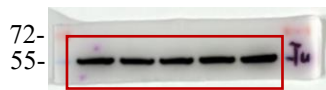

Fig. S6b-Brg1

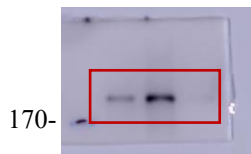

Fig. S6b-Flag-OTUD6A

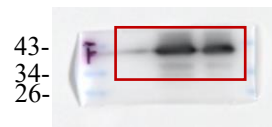

Fig. S6b-BRM

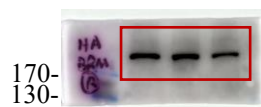

Fig. S6b-Tubulin

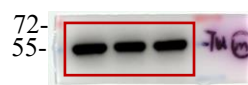

Supplement: Supplementary file 2 — Supplementary Information [file 42003_2022_3133_MOESM2_ESM.pdf]
