# Supplementary material for: OTUD6A promotes prostate tumorigenesis via deubiquitinating Brg1 and AR
Source: PubMed Central journal article supplement (PMC8888634; doi:10.1038/s42003-022-03133-1), 2022-03-01
Supplement: 42003_2022_3133_MOESM3_ESM.pdf [file 42003_2022_3133_MOESM3_ESM.pdf]

## Description of Additional Supplementary Files

**File name:** Supplementary Data 1

**Description:** Patients for IHC, Related to Figure 1.

**File name:** Supplementary Data 2

**Description:** MS, Related to Figure 4.

**File name:** Supplementary Data 3

**Description:** RNA-seq, Related to Figure 6.

**File name:** Supplementary Data 4

**Description:** Source data.
